# Supplementary material for: Panels and models for accurate prediction of tumor mutation burden in tumor samples
Source: PubMed Central journal article supplement (PMC8044185; doi:10.1038/s41698-021-00169-0), 2021-04-13
Supplement: 41698_2021_169_MOESM1_ESM.pdf [file 41698_2021_169_MOESM1_ESM.pdf]

## **Supplementary Material**

### **Panels and models for accurate prediction of tumor mutation burden in tumor samples**

Elizabeth Martínez-Pérez, Miguel Angel Molina-Vila and Cristina Marino-Buslje.

## SUPPLEMENTARY DATA

**Supplementary Data 1.** Accuracy of panels and models for TMB prediction

**Supplementary Data 2.** Suggested panels for TMB prediction in 14 cancer types, classified by Mb to be sequenced

**Supplementary Data 3.** Filters applied to the training and validation datasets

**Supplementary Data 4.** External validation dataset

**Supplementary Data 5.** Filters applied to the consensus panels and models

## SUPPLEMENTARY TABLES

**Supplementary Table 1.** Total number of samples used in the training dataset and types of tumor where >80% samples were included in the dataset.

| Selection | Genes         |                                   | Exons         |                                   |
|-----------|---------------|-----------------------------------|---------------|-----------------------------------|
|           | Total samples | Types of tumor with > 80% samples | Total samples | Types of tumor with > 80% samples |
| “our set” | 22166         | 26                                | 21035         | 23                                |
| CGC       | 22153         | 30                                | 22153         | 30                                |
| FO-panel  | 20495         | 23                                | 20495         | 23                                |

**Supplementary Table 2.** Number of consensus panels after filtering

| Conditions to be accepted |                                                                                                    | Consensus panels | Cancer type |
|---------------------------|----------------------------------------------------------------------------------------------------|------------------|-------------|
|                           |                                                                                                    | 7,242            | 25          |
| i)                        | $R^2$ model $\geq 0.6$                                                                             | 6,988            | 25          |
| ii)                       | RSE model $\leq$ median TMB in each cancer type                                                    | 6,459            | 25          |
| iii)                      | $R^2$ internal validation $\geq 0.6$ &<br>$R^2$ internal validation $\geq R^2$ model - 0.1         | 5,556            | 22          |
| iv)                       | RSE internal validation $\leq$ median TMB &<br>RSE internal validation $\leq 1.25 \cdot$ RSE model | 2,978            | 20          |
| v)                        | $R^2$ external validation $\geq 0.6$                                                               | 2,301            | 14          |

## SUPPLEMENTARY FIGURES

### DATASET

 WGS and WES data  
v84 Select exonic somatic mutations

Filter tumors with

- Inconsistencies
- < 10 mutant samples

**24726** samples for **42** tumors

---

Evaluation of 6 strategies

| Variable Type | X | Selection Type |
|---------------|---|----------------|
| Gene          | X | Our            |
| Exon          |   | FO-panel       |
|               |   | CGC            |

After gene selection by strategy, tumors >80% of initial samples with mutations in selected genes, were analysed

**22279** samples for **30** tumors

### PANELS

Panels and associated linear regression models developed by strategy and tumor

Genes were aggregated to the panels by steps.

Linear regression models were fitted with the experimental TMB

**731958** panels for **30** tumors

Panel selection models

- $R^2 \geq 0.6$
- $RSE < TMB$  cancer

**354644** panels for **25** tumors

---

Consensus panels and associated models were made with the previously selected models as seeds

**7242** panels for **25** tumors

### VALIDATION

Internal Validation  
BOOTSTRAP 1000 times  
**2978** panels for **20** tumors

---

External Validation  
4075 samples from articles  
+  
 v90 1945 COSMIC samples  
**2301** panels for **14** tumors

---

One panel selected per tumor for TMB prediction, based on performance  
25 additional panels of different sizes also reported  
**39** panels for **14** tumors

---

Immunotherapy response evaluation of selected models

Melanoma and NSCLC } % Survival



**TMB**

Time

**Supplementary Figure 1.** Workflow describing the bioinformatics-based approach used to select cancer-specific panels for TMB prediction

a

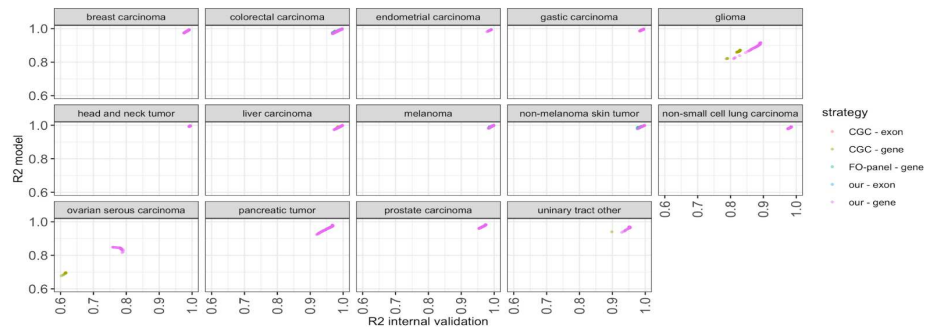

b

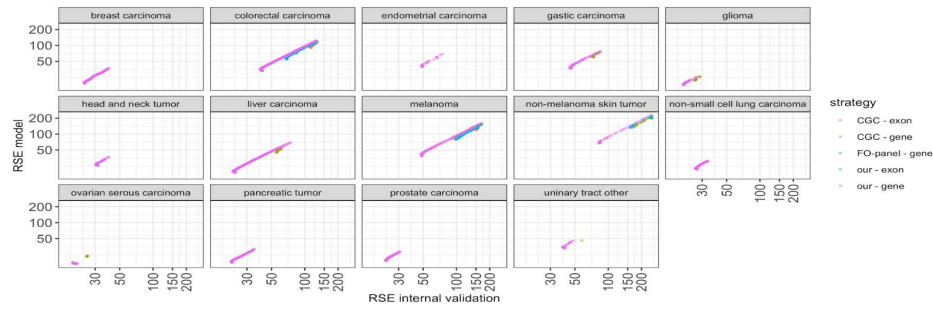

c

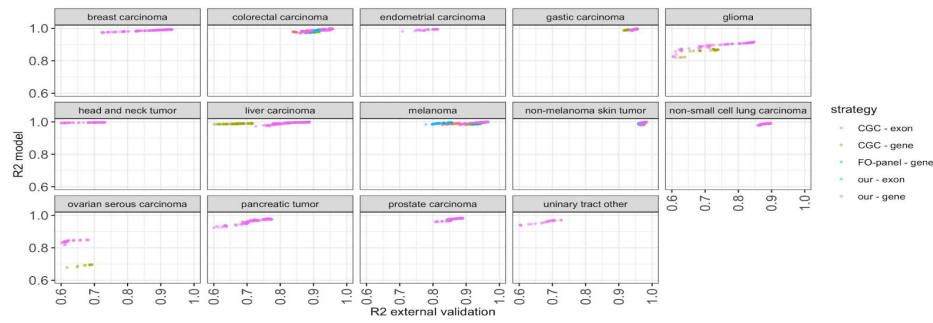

d

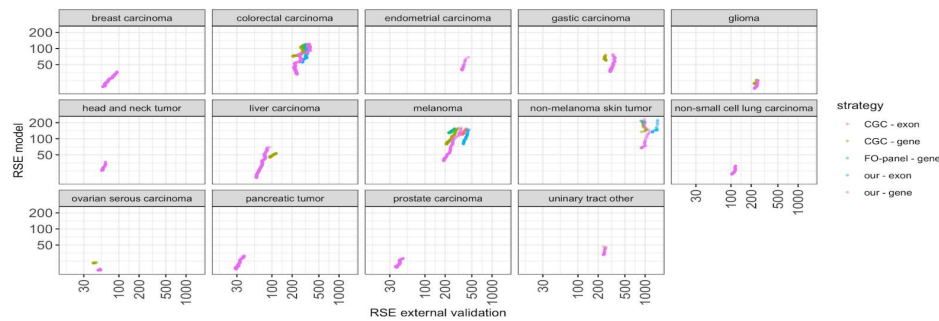

**Supplementary Figure 2. Accuracy of the panels and associated models for TMB prediction. a:**  $R^2$ , internal validation; **b:** RSE, internal validation; **c:**  $R^2$ , external validation; **d:** RSE, external validation. Each dot represents a model, colors indicate initial datasets.

**a**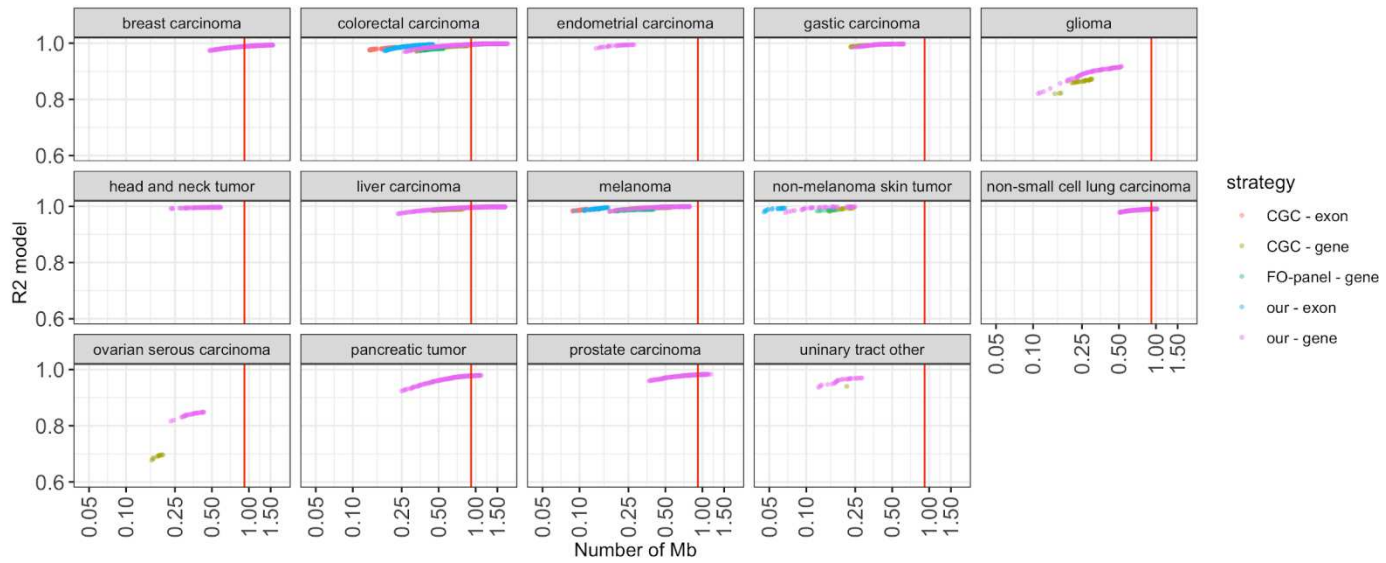**b**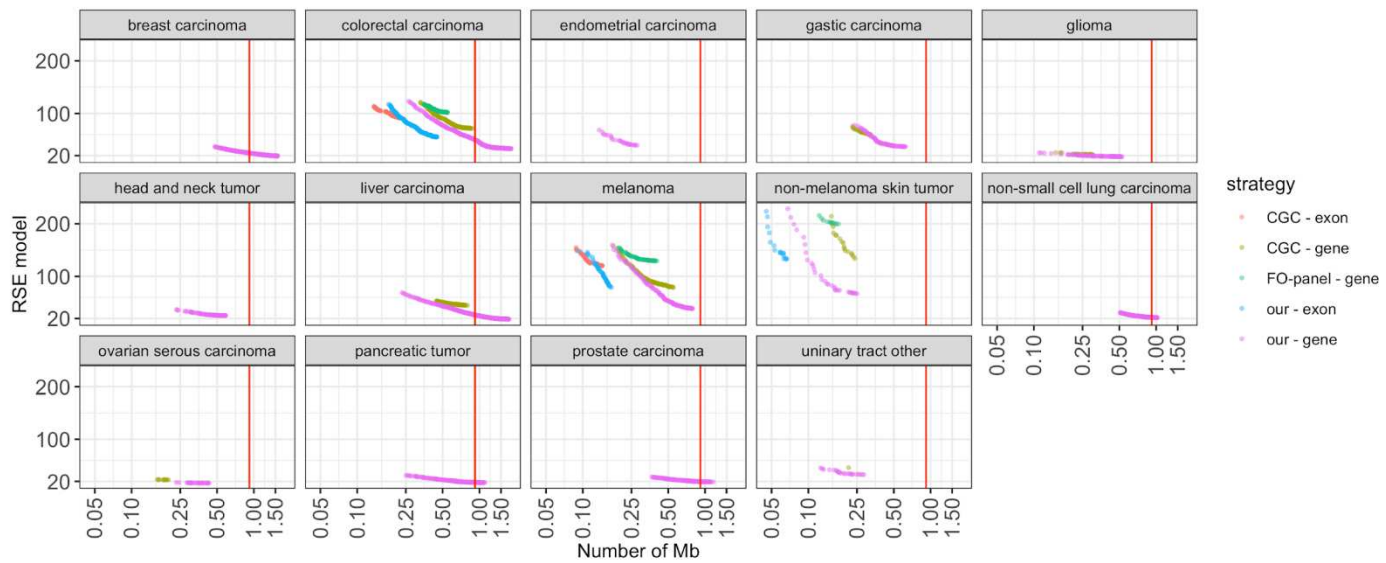

**Supplementary Figure 3.** Characteristics of the panels for TMB prediction. **a:** R2 and **b:** RSE of the panels vs. length (in Mb). Each dot represents a model, colors indicate initial datasets.

**a**

**Model\_119**

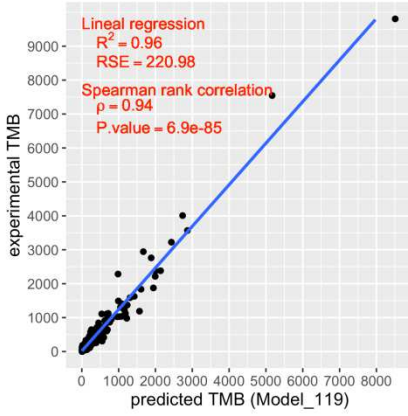

**Model\_80**

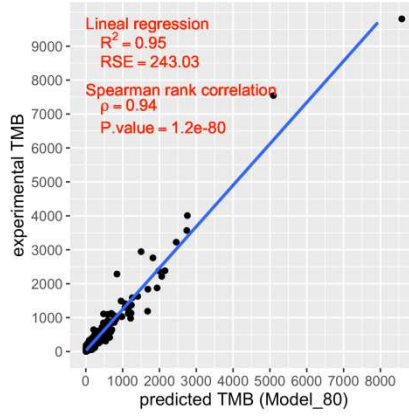

**Model\_42**

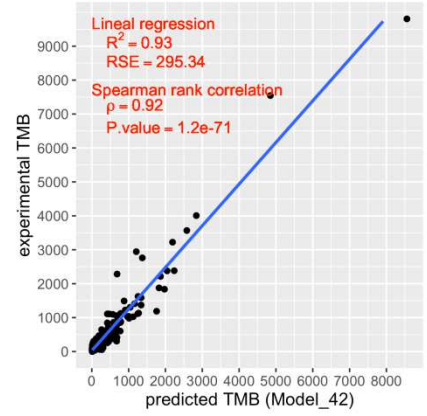

**b**

**Model\_115**

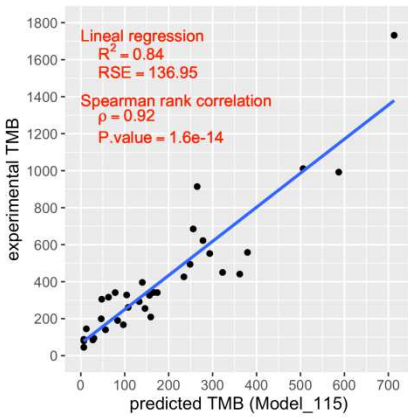

**Model\_73**

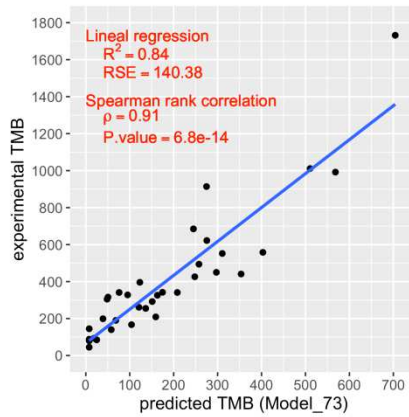

**Model\_37**

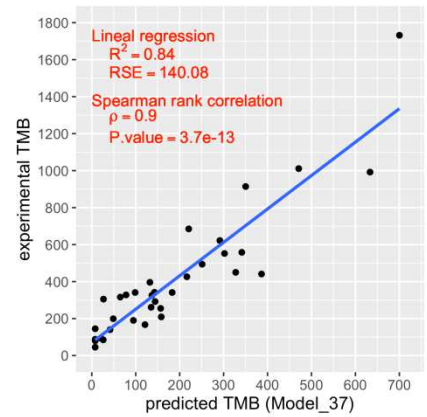

**Supplementary Figure 4.** Correlation between experimental TMB and the TMB predicted with 3 suggested panels and associated models in two cohorts of melanoma (a) and lung-non small cell patients (b).

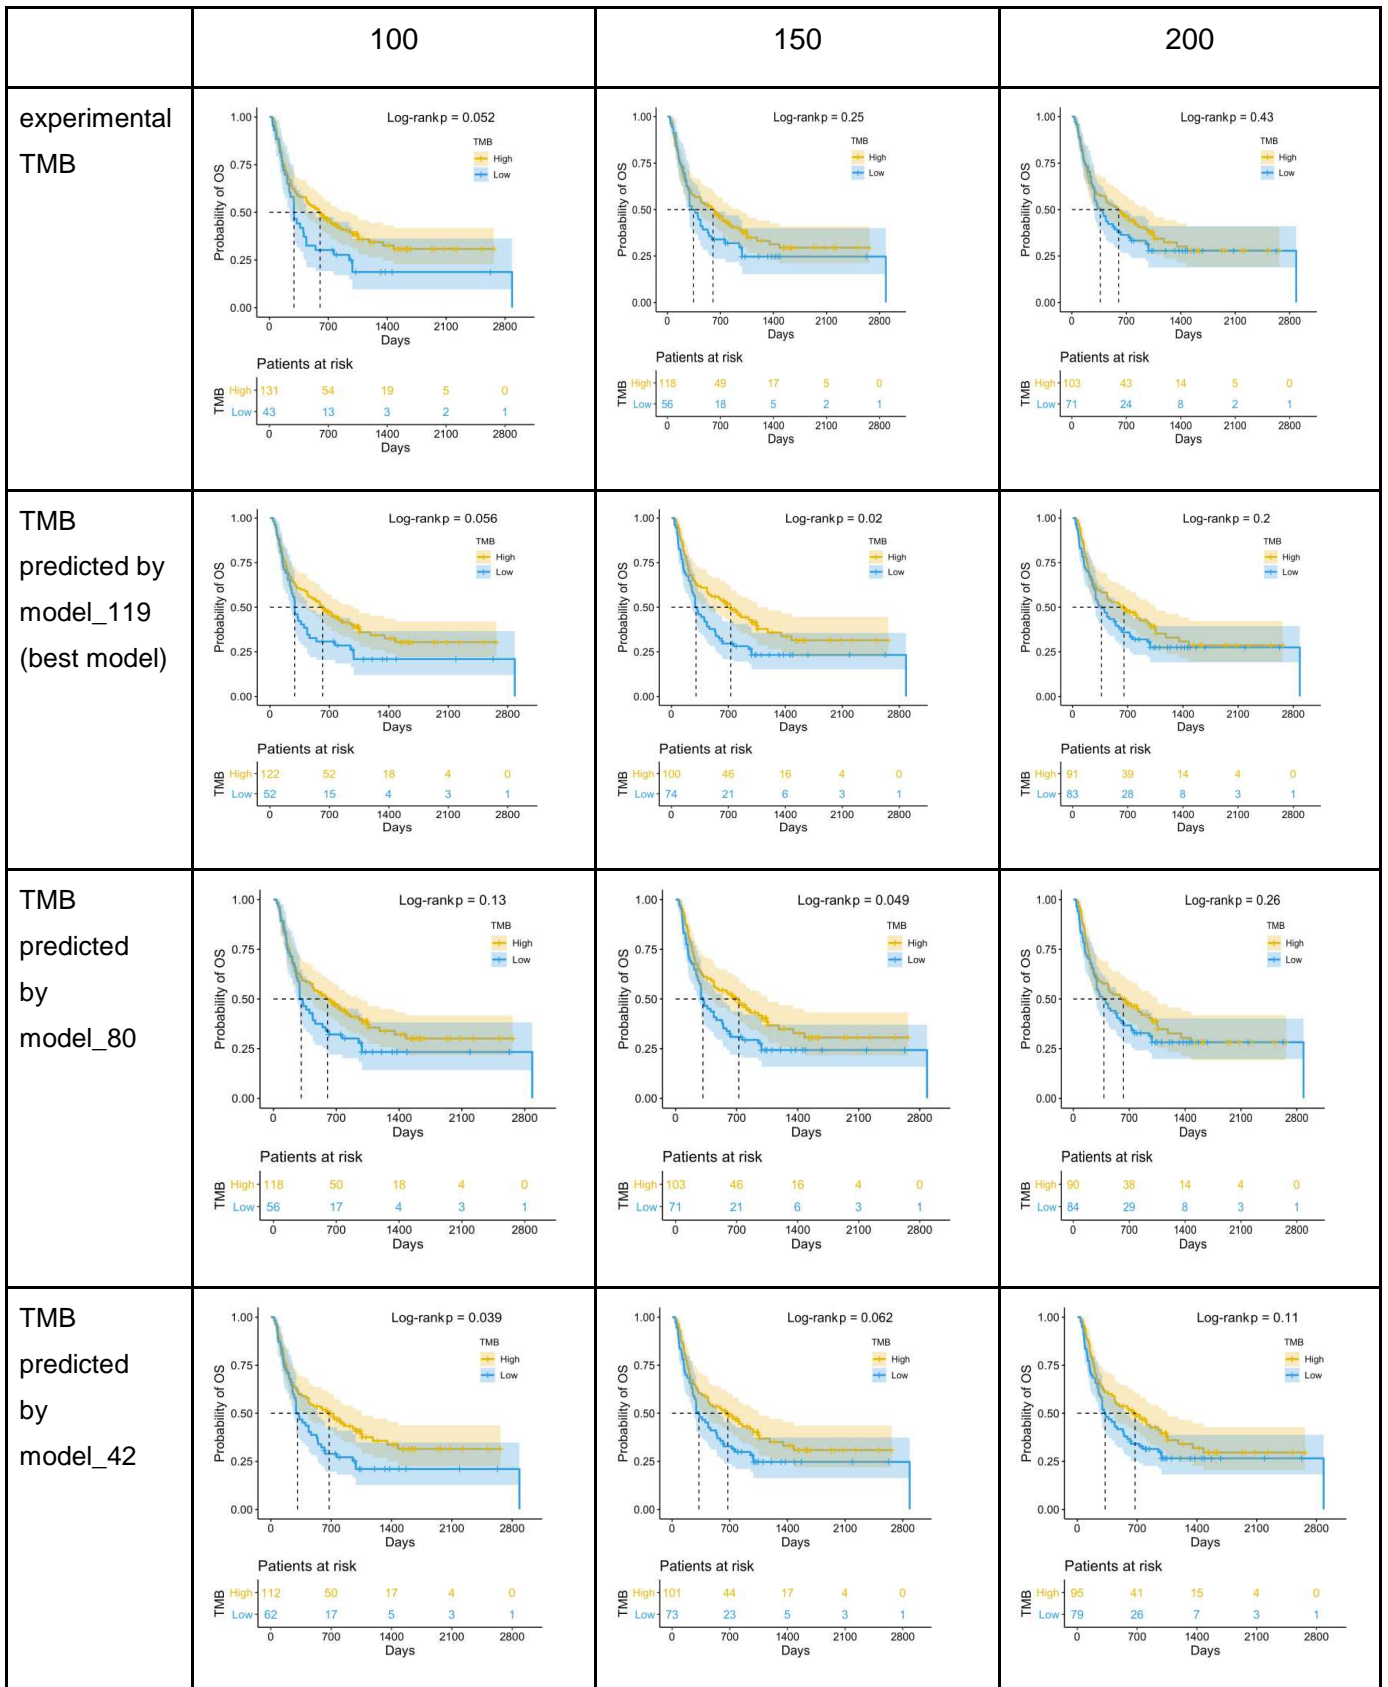

**Supplementary Figure 5.** Kaplan-Meier plot of OS in a cohort of 174 metastatic melanoma patients, treated with ICB therapy, stratified according to predicted TMB with 100, 150, and 200 cut-off values).



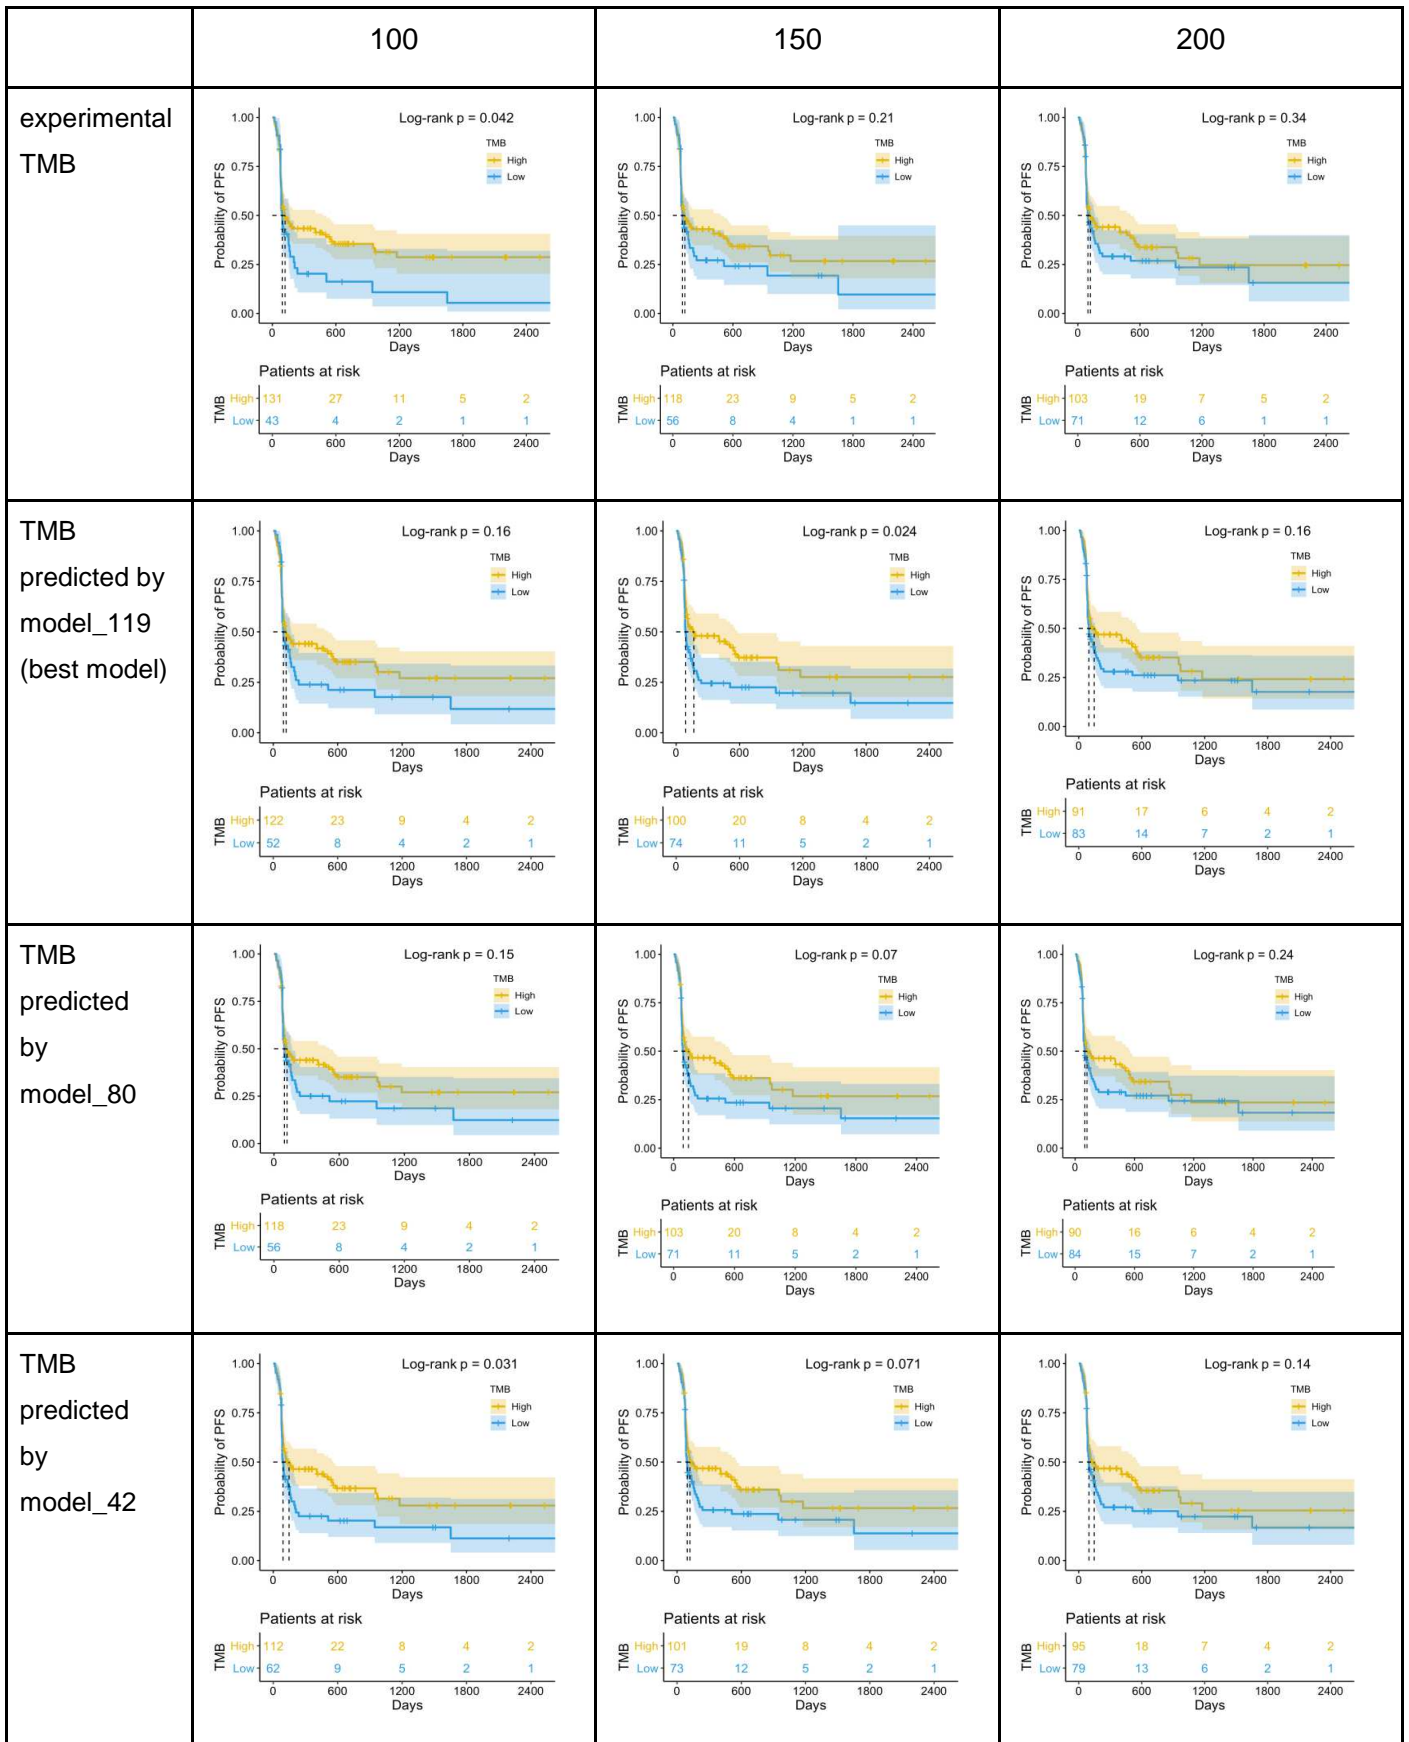

**Supplementary Figure 6:** Kaplan-Meier plot of PFS in 174 metastatic melanoma patients, treated with ICB therapy, stratified according to predicted TMB (100, 150, and 200 cut-off).



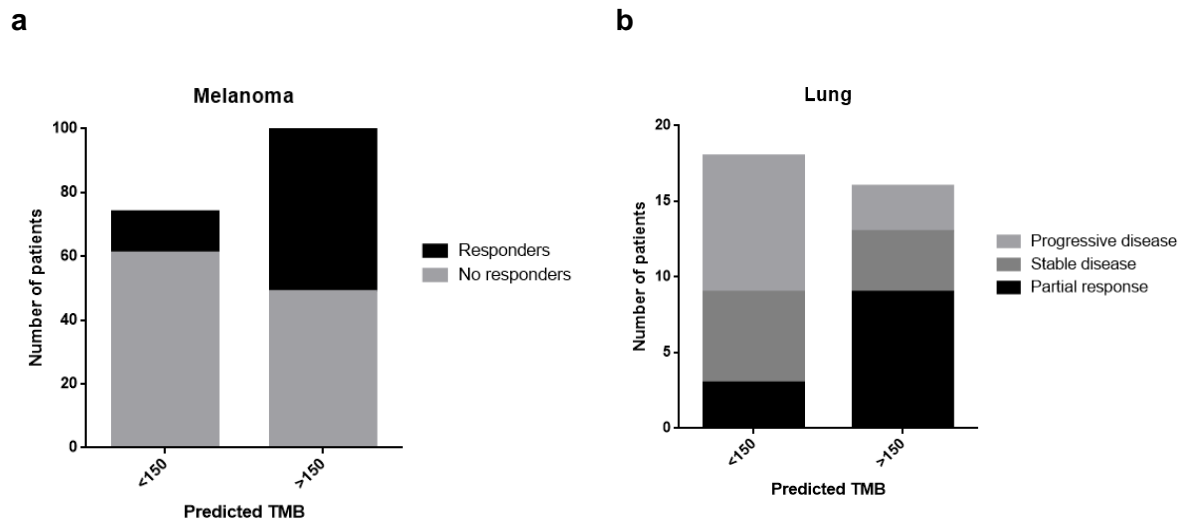

**Supplementary Figure 7:** Response to ICB therapy to 174 metastatic melanoma (a) and NSCLC (b) patients, stratified according to predicted TMB (cut-off, 150 mut/Mb)

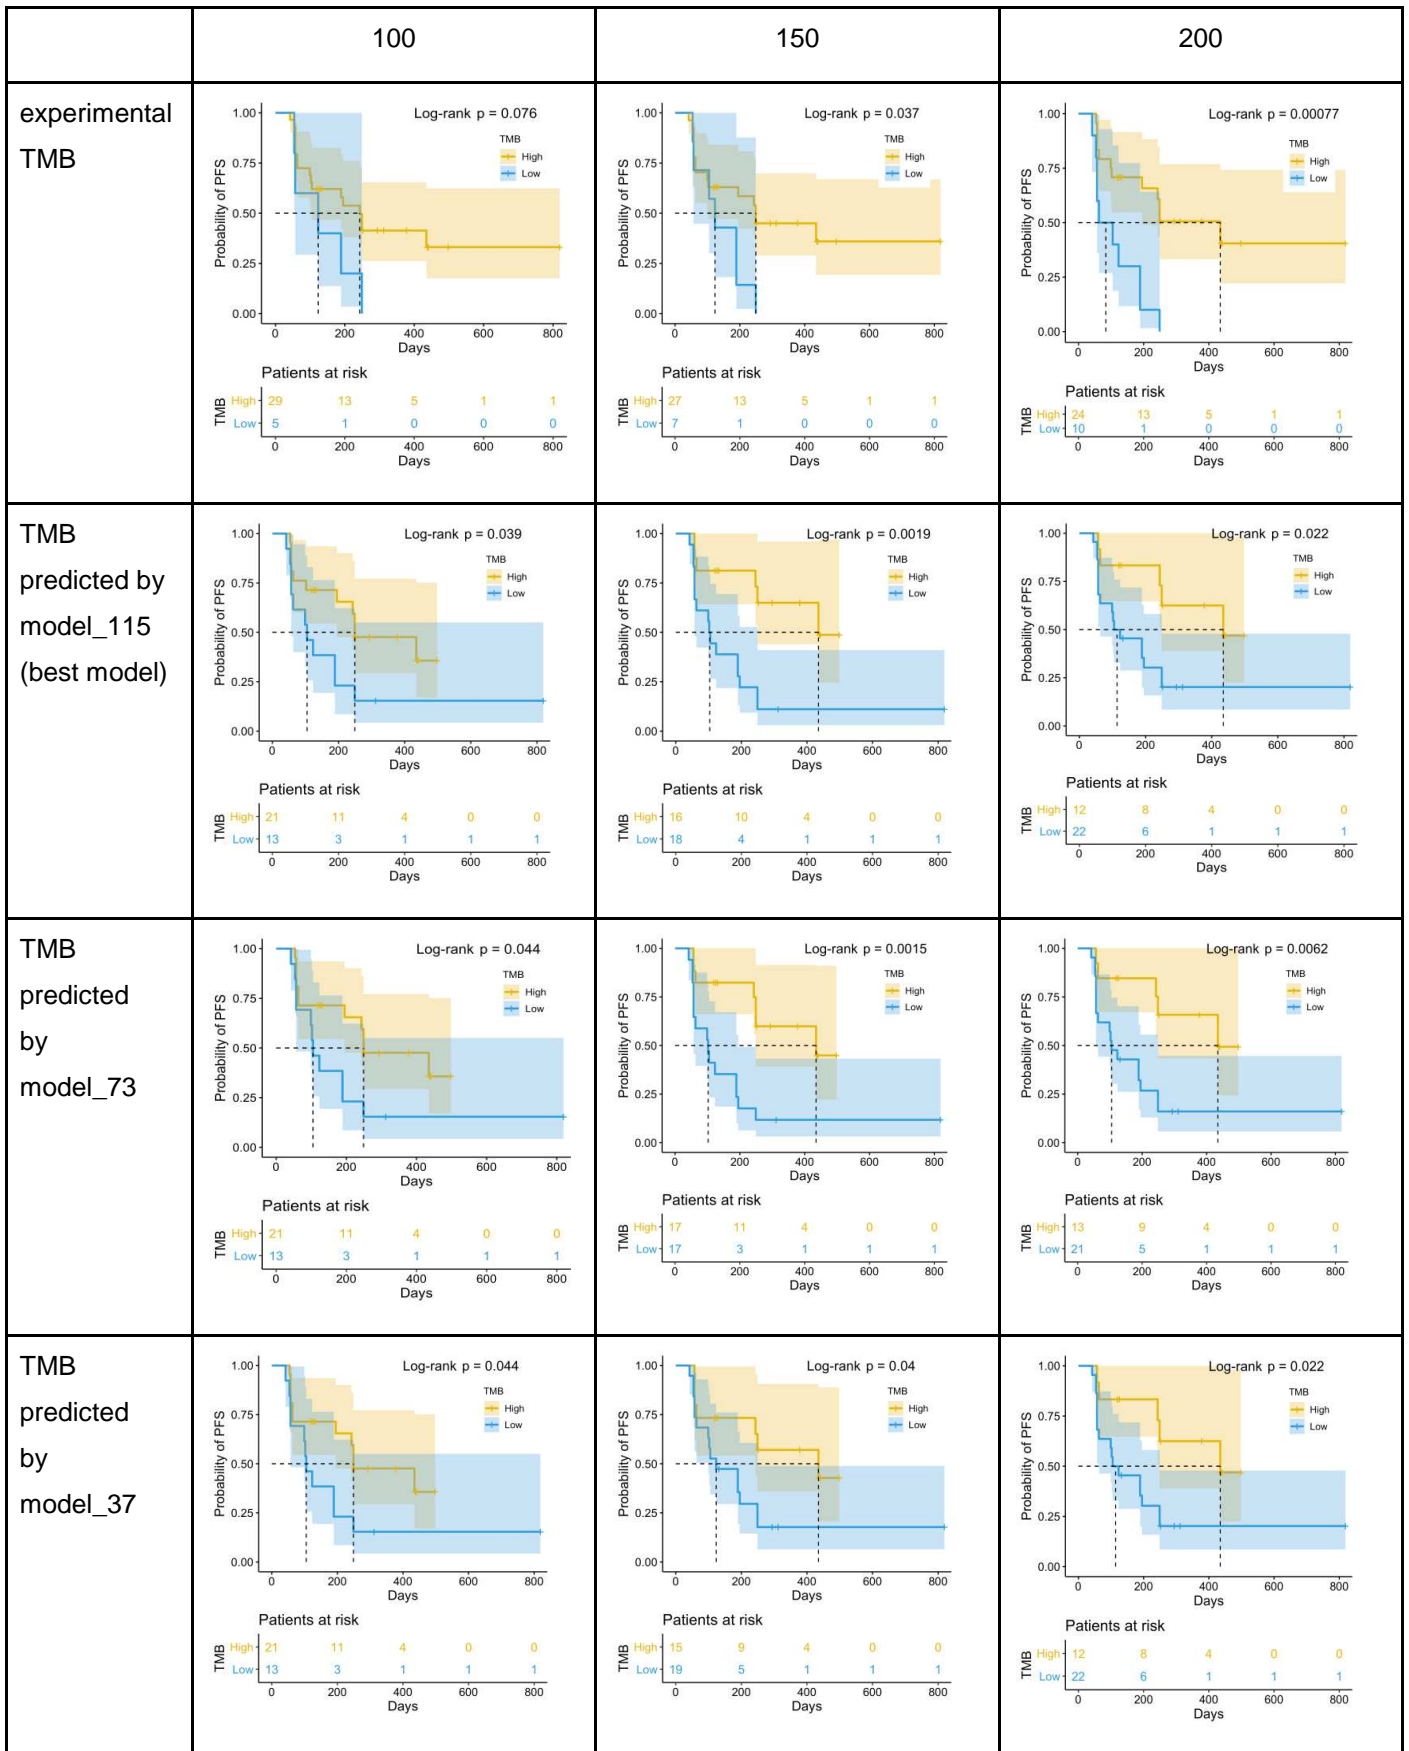

**Supplementary Figure 8.** Kaplan-Meier plot of PFS in 34 metastatic NSCLC patients, treated with ICB therapy, stratified according to predicted TMB (100, 150, and 200 cut-off).

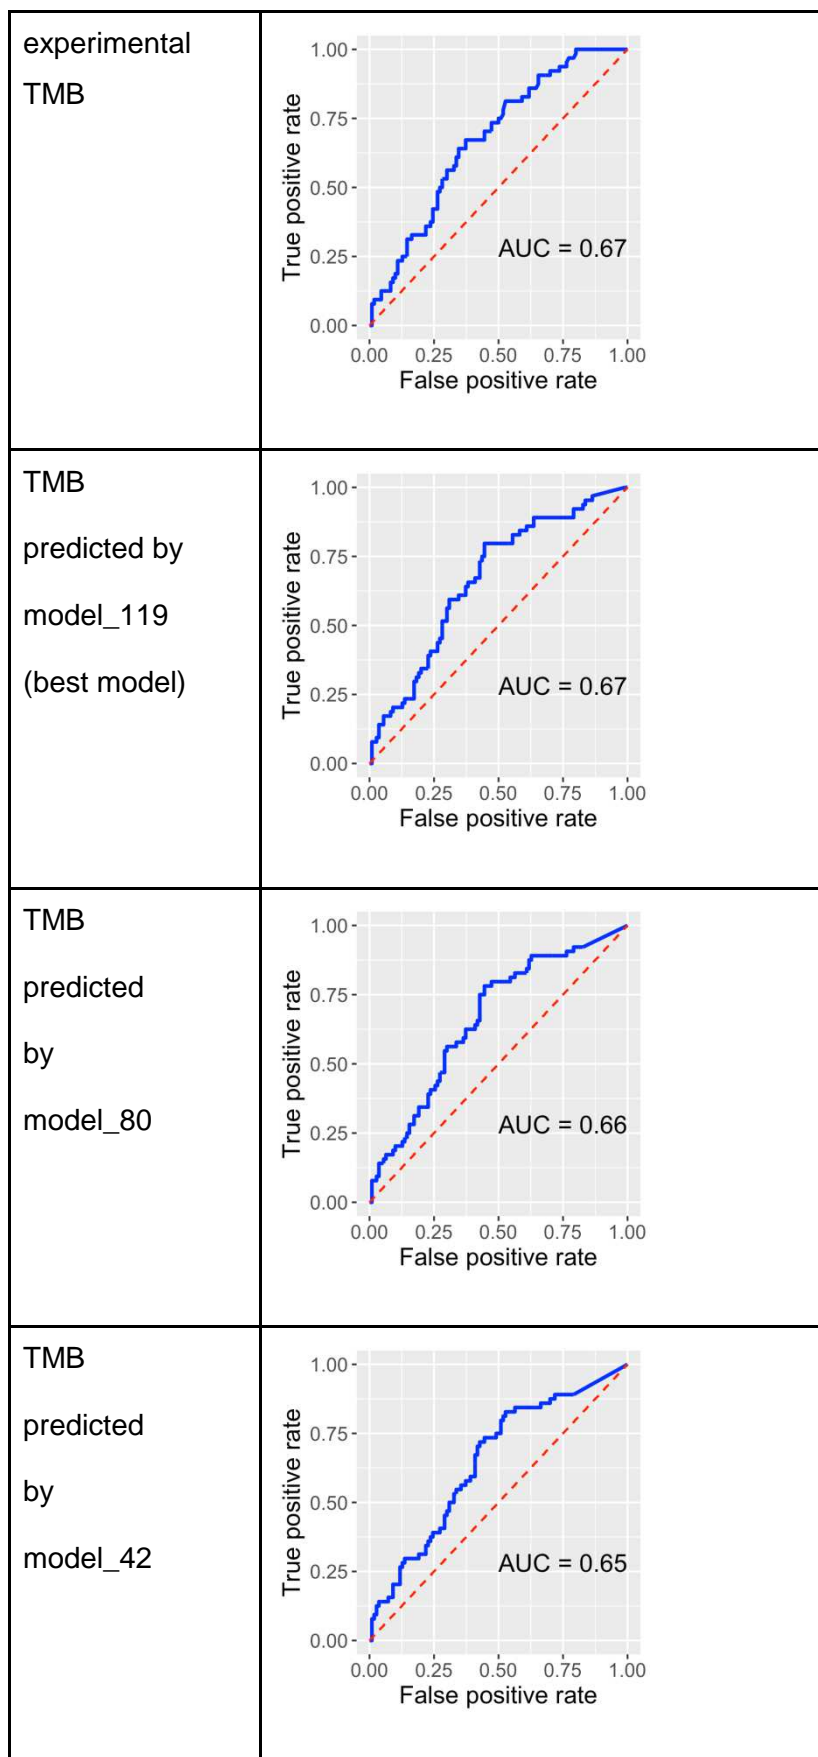

**Supplementary Figure 9:** ROC curve of predicted TMB and type of response to ICB treatment in a cohort of 174 metastatic melanoma patients

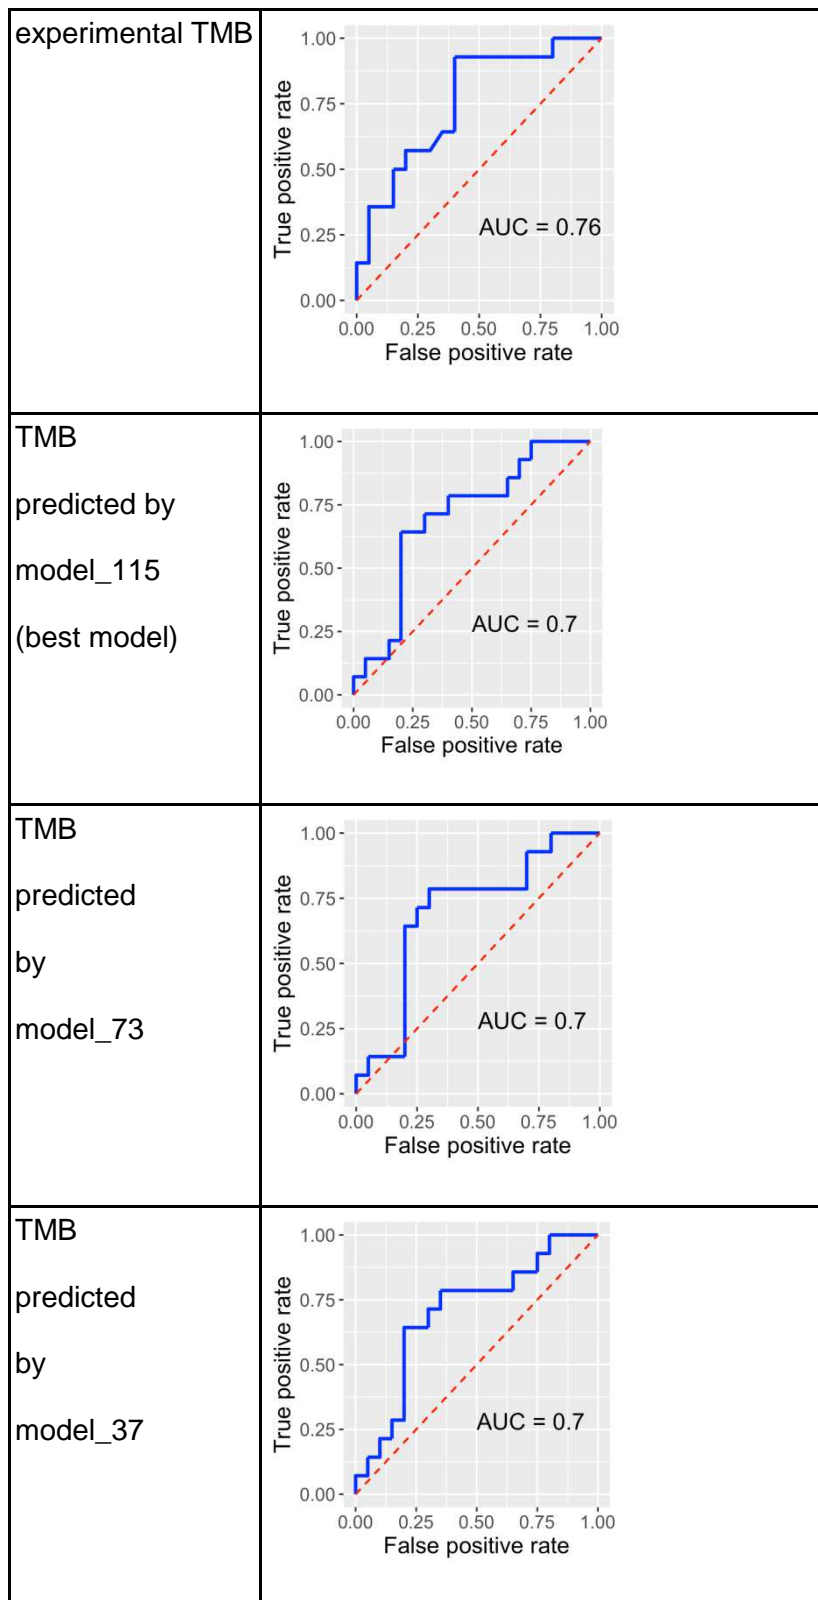

**Supplementary Figure 10:** ROC curve of predicted TMB and type of response to ICB treatment in a cohort of 34 metastatic NSCLC patients

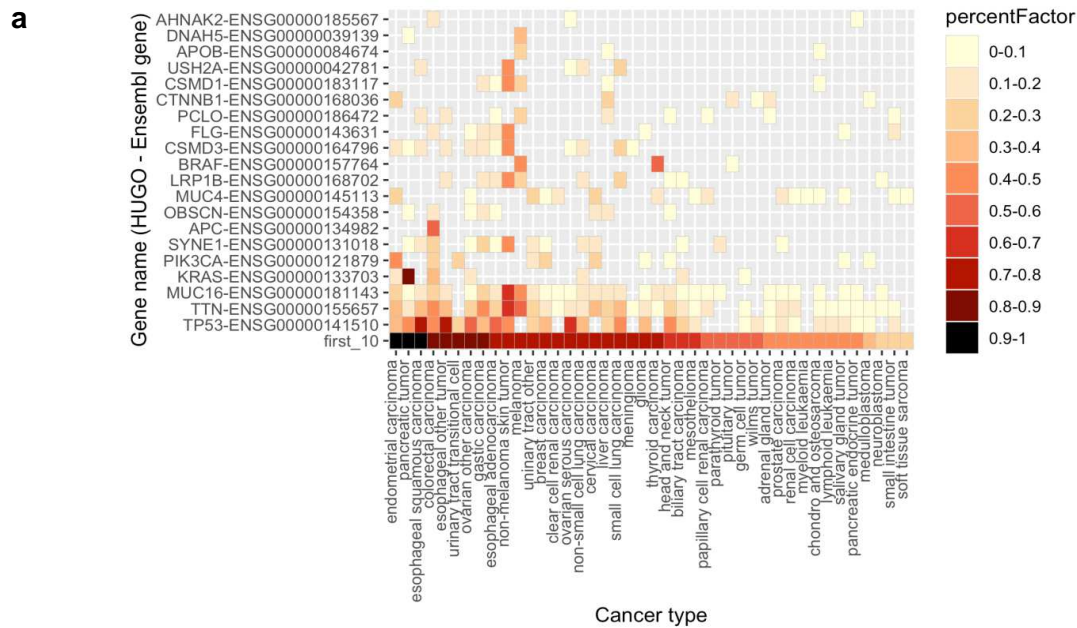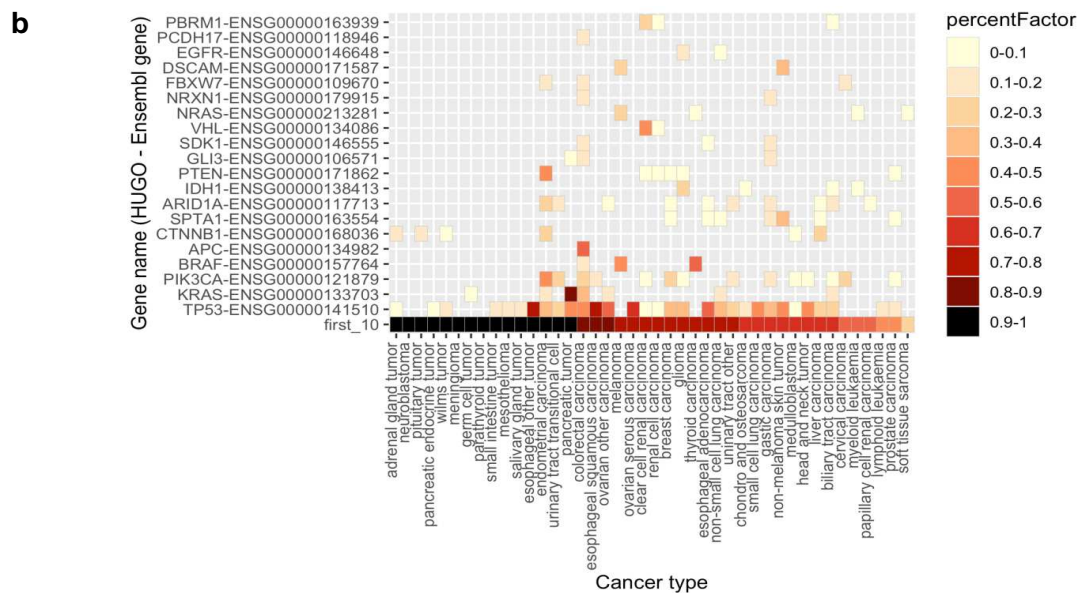

**Supplementary Figure 11. Top mutant genes per cancer type before (a) and after penalization by length (b). The intensity of the colors indicates the percentage of mutant samples. To improve clarity, only 20 of the total 157 (a) and 195 (b) top 10 mutant genes are represented**

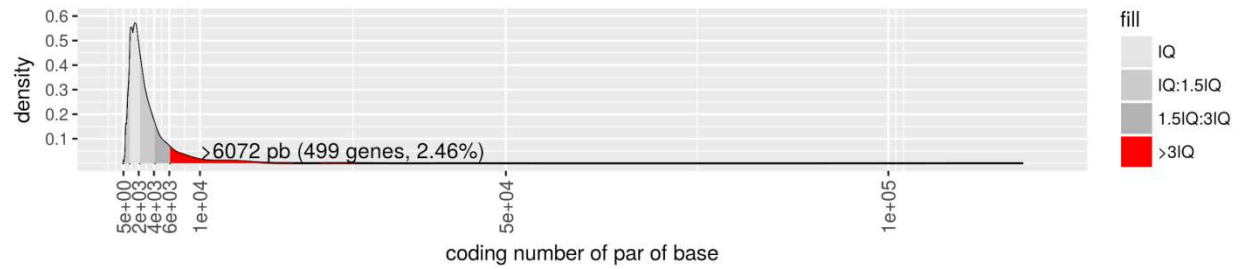

**Supplementary Figure 12.** Distribution of coding base-pairs among human genes (n= 20,291). 499 genes (2.46%) have coding regions longer than 3\*IQ distance (in red)



A

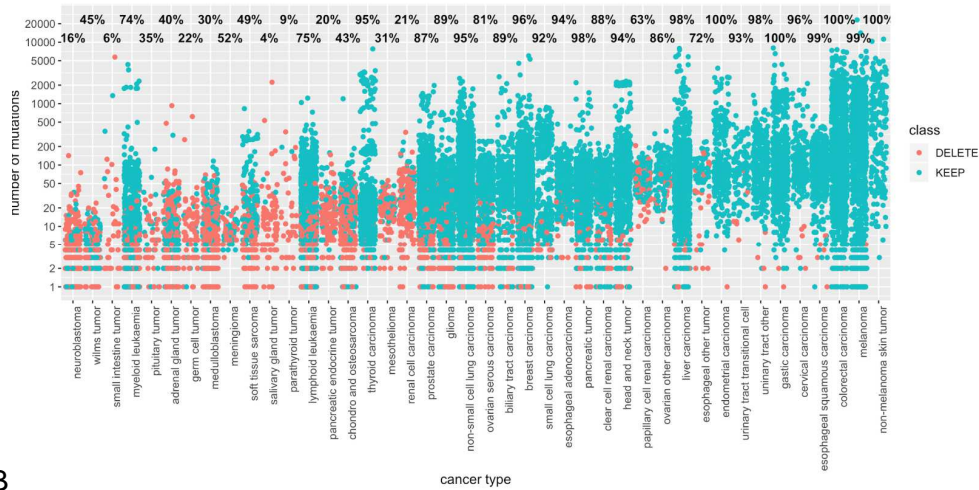

B

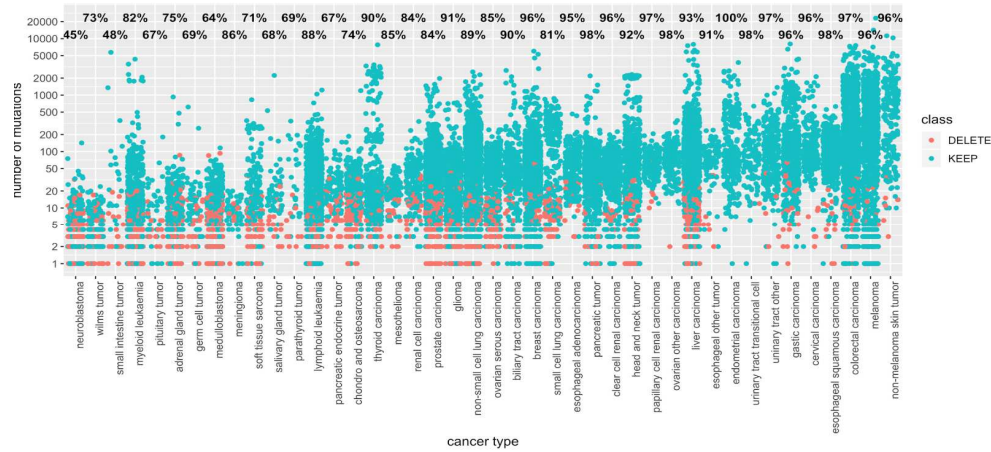

C:

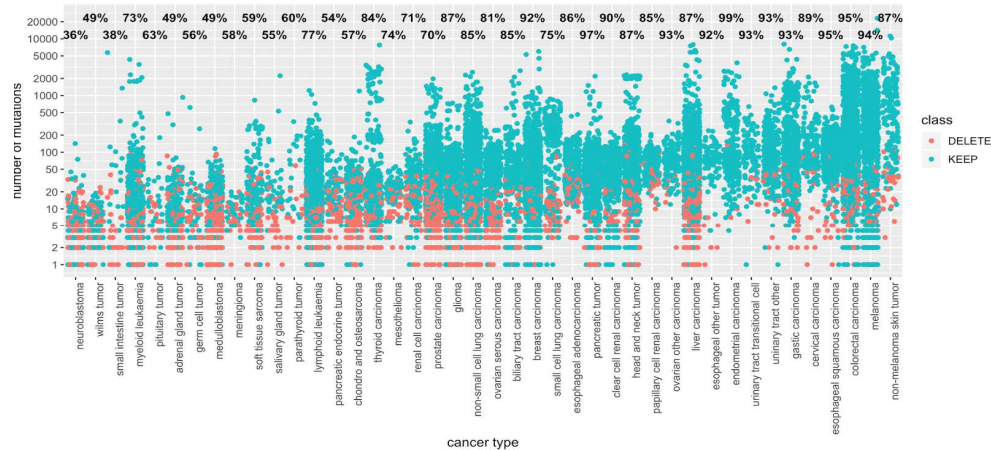

**Supplementary Figure 13. Samples conserved and excluded in our analyses by cancer type and strategy:** Each dot represents a conserved sample (blue) or a deleted sample (red). Numbers on top of each cancer type are the percentage of conserved samples. **A:** “our-exon” selection; **B:** CGC gene/exon selection; **C:** FO-panel gene/exon selection
